# Supplementary material for: [Retracted] Macrophage Rmp Ameliorates Myocardial Infarction by Modulating Macrophage Polarization in Mice
Source: Hindawi journal article supplement (doi:10.1155/2022/6248779), 2022-01-01
Supplement: f2 [file 6248779.f2.pdf]

**Tables S 1. Clinical characteristics pertaining to patients with ischemic heart failure**

| <b>No.</b> | <b>Age<br/>(Year)</b> | <b>Gender</b> | <b>Diabetes</b> | <b>Hypertension</b> | <b>Systolic function<br/>LVEF (%)</b> |  |
|------------|-----------------------|---------------|-----------------|---------------------|---------------------------------------|--|
| 1          | 56                    | Male          | Yes             | Yes                 | 24                                    |  |
| 2          | 42                    | Male          | No              | Yes                 | 27                                    |  |
| 3          | 51                    | Female        | Yes             | Yes                 | 25                                    |  |
| 4          | 49                    | Male          | No              | Yes                 | 27                                    |  |
| 5          | 59                    | Male          | Yes             | Yes                 | 26                                    |  |
| 6          | 48                    | Male          | Yes             | No                  | 27                                    |  |
