# Supplementary material for: [Retracted] Macrophage Rmp Ameliorates Myocardial Infarction by Modulating Macrophage Polarization in Mice
Source: Hindawi journal article supplement (doi:10.1155/2022/6248779), 2022-01-01
Supplement: f3 [file 6248779.f3.pdf]

| ENTREZID | Majority.p | Gene.names        | Number.o | Unique.pe | Sequence. | MS.MS.co | Q.value |
|----------|------------|-------------------|----------|-----------|-----------|----------|---------|
| 87       | A0A024R6   | ACTN1             | 40       | 25        | 54.3      | 40       | 0       |
| 4644     | A8CDT9;G   | MYO5A             | 29       | 45        | 28.7      | 56       | 0       |
| 2314     | Q13045;Q   | FLII              | 12       | 2         | 41.5      | 4        | 0       |
| 116143   | A0A140VK   | WDR92;HZGJ        | 8        | 11        | 43.4      | 14       | 0       |
| 7798     | A0A024RA   | LUZP1             | 7        | 29        | 35.1      | 34       | 0       |
| 22994    | B2RN10;Q   | AZI1;CEP131       | 8        | 28        | 30        | 30       | 0       |
| 8725     | Q6NX55;C   | C19orf2;URI1      | 10       | 17        | 42.5      | 26       | 0       |
| 79657    | Q9H6T3;Q   | RPAP3             | 3        | 16        | 32.3      | 18       | 0       |
| 81       | A0A0S2Z3   | ACTN4             | 12       | 18        | 45.2      | 27       | 0       |
| 10096    | A0A024RA   | ACTR3             | 20       | 18        | 64.4      | 25       | 0       |
| 10109    | Q53R19;O   | ARPC2             | 8        | 16        | 54        | 31       | 0       |
| 55075    | B7ZKM6;Q   | UACA              | 10       | 17        | 14.2      | 23       | 0       |
| 22998    | D6RD46;Q   | LIMCH1            | 26       | 13        | 18.1      | 15       | 0       |
| 4641     | F5H6E2;B7  | MYO1C (ikk)       | 14       | 16        | 22.4      | 20       | 0       |
| 55011    | A0A024Q2   | FLJ20643;PIH1D1   | 15       | 9         | 52.4      | 11       | 0       |
| 5202     | B1AQP2;Q   | PFDN2             | 2        | 6         | 44.8      | 12       | 0       |
| 10097    | P61160;P6  | ACTR2             | 6        | 12        | 37.1      | 17       | 0       |
| 10471    | Q5STK2;O   | PFDN6             | 4        | 7         | 45.7      | 11       | 0       |
| 5339     | Q15149-7   | PLEC;PLEC1        | 17       | 14        | 3.8       | 14       | 0       |
| 54442    | Q9NXV2;F   | KCTD5             | 2        | 6         | 34.2      | 7        | 0       |
| 3326     | B4DMA2;E   | HSP90AB1          | 22       | 8         | 20.1      | 12       | 0       |
| 9948     | Q53GN4;C   | WDR1;HEL-S-52     | 11       | 11        | 25.6      | 13       | 0       |
| NA       | CON_Q3S    | X14               | 1        | 4         | 13.8      | 5        | 0       |
| 6161     | D3YTB1;A   | RPL32             | 5        | 10        | 56.4      | 25       | 0       |
| 4659     | B2RAH5;O   | PPP1R12A          | 15       | 9         | 10.5      | 8        | 0       |
| NA       | L0R819;U3  | ASNSD1            | 6        | 6         | 70.8      | 9        | 0       |
| 51366    | E7EMW7;C   | UBR5              | 6        | 7         | 3.4       | 6        | 0       |
| 1073     | Q549N0;Q   | CFL2              | 5        | 4         | 53.6      | 6        | 0       |
| 3192     | Q96BA7;B   | HNRNPU;HNRPU      | 7        | 9         | 17        | 9        | 0       |
| 8545     | Q9UFW8;C   | CGGBP1            | 2        | 5         | 33.5      | 5        | 0       |
| 5434     | E5KT65;P1  | POLR2E            | 6        | 4         | 31        | 5        | 0       |
| 6158     | H0YKD8;P2  | RPL28             | 10       | 8         | 33.5      | 13       | 0       |
| 81572    | Q9NUG6     | PDRG1             | 1        | 6         | 47.4      | 10       | 0       |
| 284119   | B4DPZ5;B2  | PTRF              | 6        | 4         | 11.3      | 3        | 0       |
| 5756     | Q12792;Q   | TWF1              | 9        | 5         | 13.7      | 7        | 0       |
| 7511     | Q5T6H7;B   | XPNPEP1           | 8        | 5         | 16.5      | 4        | 0       |
| 6633     | P62316;K7  | SNRPD2            | 4        | 5         | 36.4      | 5        | 0       |
| 8607     | B5BUB1;Q   | RUVBL1            | 8        | 6         | 17.3      | 6        | 0       |
| 1968     | P41091;Q2  | EIF2S3;EIF2S3L    | 4        | 5         | 11.7      | 5        | 0       |
| 81873    | A0A024R8   | ARPC5L            | 3        | 3         | 20.9      | 5        | 0       |
| 26065    | Q8ND56-1   | LSM14A            | 8        | 5         | 14.5      | 6        | 0       |
| 51637    | Q5RLJ0;Q5  | C14orf166         | 6        | 3         | 13.1      | 3        | 0       |
| 506      | Q0QEN7;v   | ATP5B;HEL-S-271   | 6        | 5         | 15.7      | 3        | 0       |
| 6233     | Q5RKT7;B2  | RPS27A;HEL112;UBA | 38       | 2         | 37.2      | 5        | 0       |
| 3964     | F6V2D4;A   | LGALS8            | 14       | 5         | 19        | 5        | 0       |
| 5074     | Q96IZ0     | PAWR              | 4        | 3         | 12.1      | 5        | 0       |
| 4638     | Q15746-4   | MYLK              | 10       | 5         | 2.7       | 5        | 0       |
| 51493    | Q9Y3I0;B4  | RTCB              | 4        | 4         | 10.9      | 4        | 0       |
| 84687    | D3DTX6;Q   | PPP1R9B           | 11       | 4         | 7.1       | 4        | 0       |
| 11078    | H0Y5J9;Q5  | TRIOBP            | 10       | 4         | 19.9      | 3        | 0       |
| 4899     | A0A024R7   | NRF1              | 7        | 4         | 7.4       | 4        | 0       |
| 6144     | G3V1B3;M   | RPL21             | 6        | 3         | 39.1      | 5        | 0       |
| 84271    | Q9BY77;F5  | POLDIP3;PDIP46;DK | 12       | 4         | 10        | 4        | 0       |
| 79026    | Q8N274;Q   | AHNAK             | 5        | 4         | 12.6      | 4        | 0       |
| 8409     | A0A0C4D    | FUXT              | 3        | 3         | 21.3      | 7        | 0       |
| 1613     | B3KSK3;B3  | DAPK3             | 3        | 3         | 15.2      | 3        | 0       |
| 6164     | A0A024R    | C RPL34           | 2        | 3         | 14.5      | 4        | 0       |

|                                 |    |   |      |    |   |
|---------------------------------|----|---|------|----|---|
| 10726 Q9Y266 NUDC               | 4  | 3 | 11.5 | 4  | 0 |
| 2194 P49327;Q6 FASN             | 3  | 3 | 1.4  | 3  | 0 |
| 966 E9PNW4;C CD59               | 5  | 2 | 22.2 | 3  | 0 |
| 79784 Q7Z406;Q MYH14            | 7  | 2 | 7.6  | 36 | 0 |
| 1508 B4DL49;A6 CTSB;DKFZp686N01 | 18 | 2 | 7    | 3  | 0 |
| 8148 B4E312;A0 TAF15            | 4  | 2 | 7.8  | 3  | 0 |

| Score  | MS.MS.cot | MS.MS.cot | iBAQ     | Symbol    | Rank | IgG.1 | rmp.1 | im..IgG.1 |
|--------|-----------|-----------|----------|-----------|------|-------|-------|-----------|
| 323.31 | 11        | 29        | 34240000 | ACTN1     | 156  | 11    | 29    | FALSE     |
| 323.31 | 13        | 43        | 23183000 | MYO5A     | 196  | 13    | 43    | FALSE     |
| 323.31 | 0         | 4         | 876010   | Q13045    | 483  | 0     | 4     | TRUE      |
| 295.54 | 0         | 14        | 48109000 | WDR92     | 125  | 0     | 14    | TRUE      |
| 280.7  | 9         | 25        | 21173000 | LUZP1     | 206  | 9     | 25    | FALSE     |
| 275.76 | 0         | 30        | 20446000 | AZI1      | 214  | 0     | 30    | TRUE      |
| 246.76 | 0         | 26        | 1.93E+08 | C19orf2   | 42   | 0     | 26    | TRUE      |
| 199.78 | 0         | 18        | 24718000 | RPAP3     | 187  | 0     | 18    | TRUE      |
| 199.57 | 5         | 22        | 19095000 | ACTN4     | 219  | 5     | 22    | FALSE     |
| 179.64 | 4         | 21        | 99921000 | ACTR3     | 80   | 4     | 21    | FALSE     |
| 179.32 | 8         | 23        | 1.18E+08 | ARPC2     | 66.5 | 8     | 23    | FALSE     |
| 177.06 | 4         | 19        | 8442600  | UACA      | 301  | 4     | 19    | FALSE     |
| 156.61 | 3         | 12        | 7320400  | LIMCH1    | 315  | 3     | 12    | FALSE     |
| 155.98 | 4         | 16        | 10635000 | MYO1C     | 280  | 4     | 16    | FALSE     |
| 151.15 | 0         | 11        | 28946000 | FLJ20643  | 175  | 0     | 11    | TRUE      |
| 121.56 | 2         | 10        | 1.42E+08 | PFDN2     | 62   | 2     | 10    | FALSE     |
| 118.68 | 2         | 15        | 85694000 | ACTR2     | 89   | 2     | 15    | FALSE     |
| 111.08 | 0         | 11        | 1.37E+08 | PFDN6     | 65   | 0     | 11    | TRUE      |
| 110.12 | 0         | 14        | 933870   | PLEC      | 477  | 0     | 14    | TRUE      |
| 107.25 | 0         | 7         | 73727000 | KCTD5     | 100  | 0     | 7     | TRUE      |
| 101.86 | 3         | 9         | 13143000 | HSP90AB1  | 258  | 3     | 9     | FALSE     |
| 90.975 | 0         | 13        | 10655000 | WDR1      | 279  | 0     | 13    | TRUE      |
| 78.104 | 0         | 5         | 2516900  | CON_Q39   | 416  | 0     | 5     | TRUE      |
| 76.099 | 6         | 19        | 3.01E+08 | RPL32     | 22   | 6     | 19    | FALSE     |
| 72.109 | 1         | 7         | 7801800  | PPP1R12A  | 308  | 1     | 7     | FALSE     |
| 66.999 | 0         | 9         | 2.51E+08 | ASNSD1    | 30   | 0     | 9     | TRUE      |
| 59.096 | 0         | 6         | 563620   | UBR5      | 504  | 0     | 6     | TRUE      |
| 58.821 | 1         | 5         | 14101000 | CFL2      | 252  | 1     | 5     | FALSE     |
| 58.418 | 1         | 8         | 12716000 | HNRNPU    | 264  | 1     | 8     | FALSE     |
| 57.3   | 0         | 5         | 32120000 | CGGBP1    | 165  | 0     | 5     | TRUE      |
| 56.909 | 0         | 5         | 15404000 | POLR2E    | 239  | 0     | 5     | TRUE      |
| 54.259 | 3         | 10        | 62748000 | RPL28     | 113  | 3     | 10    | FALSE     |
| 54.052 | 0         | 10        | 76223000 | PDRG1     | 96   | 0     | 10    | TRUE      |
| 53.501 | 0         | 3         | 9170300  | PTRF      | 295  | 0     | 3     | TRUE      |
| 52.47  | 1         | 6         | 4476400  | TWF1      | 355  | 1     | 6     | FALSE     |
| 49.947 | 0         | 4         | 4988100  | XPNPEP1   | 350  | 0     | 4     | TRUE      |
| 42.087 | 1         | 4         | 29360000 | SNRPD2    | 172  | 1     | 4     | FALSE     |
| 40.121 | 0         | 6         | 4371200  | RUVBL1    | 357  | 0     | 6     | TRUE      |
| 39.529 | 0         | 5         | 1874400  | EIF2S3    | 439  | 0     | 5     | TRUE      |
| 38.863 | 1         | 4         | 62938000 | ARPC5L    | 111  | 1     | 4     | FALSE     |
| 36.492 | 1         | 5         | 13727000 | LSM14A    | 254  | 1     | 5     | FALSE     |
| 35.575 | 0         | 3         | 5632400  | C14orf166 | 334  | 0     | 3     | TRUE      |
| 35.065 | 0         | 3         | 3515600  | ATP5B     | 385  | 0     | 3     | TRUE      |
| 32.736 | 1         | 4         | 43932000 | RPS27A    | 137  | 1     | 4     | FALSE     |
| 32.655 | 0         | 5         | 8303000  | LGALS8    | 302  | 0     | 5     | TRUE      |
| 29.927 | 1         | 4         | 15201000 | PAWR      | 243  | 1     | 4     | FALSE     |
| 28.129 | 0         | 5         | 486350   | MYLK      | 507  | 0     | 5     | TRUE      |
| 27.494 | 0         | 4         | 3117300  | RTCB      | 397  | 0     | 4     | TRUE      |
| 26.97  | 0         | 4         | 3132000  | PPP1R9B   | 395  | 0     | 4     | TRUE      |
| 26.931 | 0         | 3         | 5190400  | TRIOBP    | 342  | 0     | 3     | TRUE      |
| 26.83  | 0         | 4         | 16338000 | NRF1      | 232  | 0     | 4     | TRUE      |
| 25.154 | 1         | 4         | 36472000 | RPL21     | 149  | 1     | 4     | FALSE     |
| 25.126 | 0         | 4         | 3264000  | POLDIP3   | 393  | 0     | 4     | TRUE      |
| 21.299 | 0         | 4         | 212180   | AHNAK     | 530  | 0     | 4     | TRUE      |
| 21.079 | 0         | 7         | 28710000 | UXT       | 179  | 0     | 7     | TRUE      |
| 20.051 | 0         | 3         | 12654000 | DAPK3     | 265  | 0     | 3     | TRUE      |
| 18.884 | 0         | 4         | 41689000 | RPL34     | 141  | 0     | 4     | TRUE      |

|        |   |    |                |     |   |    |       |
|--------|---|----|----------------|-----|---|----|-------|
| 18.099 | 0 | 4  | 4839500 NUDC   | 352 | 0 | 4  | TRUE  |
| 17.271 | 0 | 3  | 157850 FASN    | 533 | 0 | 3  | TRUE  |
| 16.574 | 0 | 3  | 22032000 CD59  | 202 | 0 | 3  | TRUE  |
| 12.406 | 6 | 30 | 63665000 MYH14 | 110 | 6 | 30 | FALSE |
| 11.845 | 0 | 3  | 3643800 CTSB   | 380 | 0 | 3  | TRUE  |
| 11.628 | 0 | 3  | 6855900 TAF15  | 323 | 0 | 3  | TRUE  |

| im..rmp.1 | IgG | rmp | fc..rmp.lgC | class..rmp. | Alias | preferred_ | protein_siz | annotator         |
|-----------|-----|-----|-------------|-------------|-------|------------|-------------|-------------------|
| FALSE     |     | 11  | 29          | 1.022347    | T     | ACTN1      | ACTN1       | 914 actinin, al   |
| FALSE     |     | 13  | 43          | 1.348838    | T     | MYO5A      | MYO5A       | 1855 myosin VA    |
| FALSE     |     | 0   | 4           | 2.07864     | T     | FLII       | FLII        | 1269 flightless I |
| FALSE     |     | 0   | 14          | 3.618745    | T     | HZGJ;WDF   | WDR92       | 357 WD repeat     |
| FALSE     |     | 9   | 25          | 1.080695    | T     | LUZP1      | LUZP1       | 1076 leucine zip  |
| FALSE     |     | 0   | 30          | 4.654245    | T     | CEP131;AZ  | AZI1        | 1080 5-azacytid   |
| FALSE     |     | 0   | 26          | 4.456581    | T     | C19orf2;UI | URI1        | 535 URI1, pref    |
| FALSE     |     | 0   | 18          | 3.954978    | T     | RPAP3      | RPAP3       | 665 RNA polyn     |
| FALSE     |     | 5   | 22          | 1.642508    | T     | ACTN4      | ACTN4       | 911 actinin, al   |
| FALSE     |     | 4   | 21          | 1.842091    | T     | ACTR3      | ACTR3       | 418 ARP3 actir    |
| FALSE     |     | 8   | 23          | 1.118324    | T     | ARPC2      | ARPC2       | 300 actin relate  |
| FALSE     |     | 4   | 19          | 1.706148    | T     | UACA       | UACA        | 1416 uveal auto   |
| FALSE     |     | 3   | 12          | 1.415795    | T     | LIMCH1     | LIMCH1      | 1083 LIM and ca   |
| FALSE     |     | 4   | 16          | 1.474707    | T     | MYO1C      | MYO1C       | 1063 myosin IC;   |
| FALSE     |     | 0   | 11          | 3.302501    | T     | FLJ20643;F | PIH1D1      | 290 PIH1 dom      |
| FALSE     |     | 2   | 10          | 1.594584    | T     | PFDN2      | PFDN2       | 154 prefoldin s   |
| FALSE     |     | 2   | 15          | 2.125467    | T     | ACTR2      | ACTR2       | 399 ARP2 actir    |
| FALSE     |     | 0   | 11          | 3.302501    | T     | PFDN6      | NA          | NA                |
| FALSE     |     | 0   | 14          | 3.618745    | T     | PLEC;PLEC  | PLEC        | 4684 plectin      |
| FALSE     |     | 0   | 7           | 2.731651    | T     | KCTD5      | KCTD5       | 234 potassium     |
| FALSE     |     | 3   | 9           | 1.045128    | T     | HSP90AB1   | HSP90AB1    | 724 heat shock    |
| FALSE     |     | 0   | 13          | 3.520836    | T     | WDR1;HEL   | WDR1        | 606 WD repeat     |
| FALSE     |     | 0   | 5           | 2.33059     | T     |            | NA          | NA                |
| FALSE     |     | 6   | 19          | 1.220721    | T     | RPL32      | RPL32       | 135 ribosomal     |
| FALSE     |     | 1   | 7           | 1.731651    | T     | PPP1R12A   | PPP1R12A    | 1030 protein ph   |
| FALSE     |     | 0   | 9           | 3.045128    | T     | ASNSD1     | NA          | NA                |
| FALSE     |     | 0   | 6           | 2.545013    | T     | UBR5       | UBR5        | 2799 ubiquitin p  |
| FALSE     |     | 1   | 5           | 1.33059     | T     | CFL2       | CFL2        | 166 cofilin 2 (n  |
| FALSE     |     | 1   | 8           | 1.896887    | T     | HNRNPU;H   | HNRNPU      | 825 heterogen     |
| FALSE     |     | 0   | 5           | 2.33059     | T     | CGGBP1     | CGGBP1      | 167 CGG triple    |
| FALSE     |     | 0   | 5           | 2.33059     | T     | POLR2E     | POLR2E      | 210 polymeras     |
| FALSE     |     | 3   | 10          | 1.179546    | T     | RPL28      | RPL28       | 169 ribosomal     |
| FALSE     |     | 0   | 10          | 3.179546    | T     | PDRG1      | PDRG1       | 133 p53 and D     |
| FALSE     |     | 0   | 3           | 1.77318     | T     | CAVIN1     | SKOR1       | 965 SKI family    |
| FALSE     |     | 1   | 6           | 1.545013    | T     | TWF1       | TWF1        | 357 twinfilin, a  |
| FALSE     |     | 0   | 4           | 2.07864     | T     | XPNPEP1    | XPNPEP1     | 666 X-prolyl ar   |
| FALSE     |     | 1   | 4           | 1.07864     | T     | SNRPD2     | SNRPD2      | 118 small nucle   |
| FALSE     |     | 0   | 6           | 2.545013    | T     | RUVBL1     | RUVBL1      | 456 RuvB-like     |
| FALSE     |     | 0   | 5           | 2.33059     | T     | EIF2S3;EIF | EIF2S3      | 472 eukaryotic    |
| FALSE     |     | 1   | 4           | 1.07864     | T     | ARPC5L     | ARPC5L      | 153 actin relate  |
| FALSE     |     | 1   | 5           | 1.33059     | T     | LSM14A     | LSM14A      | 463 LSM14A, S     |
| FALSE     |     | 0   | 3           | 1.77318     | T     | C14orf166  | C14orf166   | 244 chromosom     |
| FALSE     |     | 0   | 3           | 1.77318     | T     | ATP5B      | ATP5B       | 529 ATP synth     |
| FALSE     |     | 1   | 4           | 1.07864     | T     | UBC;UBB;L  | RPS27A      | 156 ribosomal     |
| FALSE     |     | 0   | 5           | 2.33059     | T     | LGALS8     | LGALS8      | 359 lectin, gala  |
| FALSE     |     | 1   | 4           | 1.07864     | T     | PAWR       | PAWR        | 340 PRKC, apo     |
| FALSE     |     | 0   | 5           | 2.33059     | T     | MYLK       | MYLK        | 1914 myosin lig   |
| FALSE     |     | 0   | 4           | 2.07864     | T     | RTCB       | C22orf28    | 505 chromosom     |
| FALSE     |     | 0   | 4           | 2.07864     | T     | PPP1R9B    | NA          | NA                |
| FALSE     |     | 0   | 3           | 1.77318     | T     | TRIOBP     | TRIOBP      | 2365 TRIO and I   |
| FALSE     |     | 0   | 4           | 2.07864     | T     | NRF1       | NRF1        | 503 nuclear res   |
| FALSE     |     | 1   | 4           | 1.07864     | T     | RPL21      | RPL21       | 160 ribosomal     |
| FALSE     |     | 0   | 4           | 2.07864     | T     | POLDIP3;P  | POLDIP3     | 421 polymeras     |
| FALSE     |     | 0   | 4           | 2.07864     | T     | AHNAK      | AHNAK       | 5890 AHNAK nu     |
| FALSE     |     | 0   | 7           | 2.731651    | T     | UXT        | UXT         | 169 ubiquitous    |
| FALSE     |     | 0   | 3           | 1.77318     | T     | DAPK3      | DAPK3       | 454 death-assc    |
| FALSE     |     | 0   | 4           | 2.07864     | T     | RPL34      | RPL34       | 117 ribosomal     |

|       |   |    |           |           |       |                   |
|-------|---|----|-----------|-----------|-------|-------------------|
| FALSE | 0 | 4  | 2.07864 T | NUDC      | NUDC  | 331 nuclear dis   |
| FALSE | 0 | 3  | 1.77318 T | FASN      | FASN  | 2511 fatty acid s |
| FALSE | 0 | 3  | 1.77318 T | CD59      | CD59  | 128 CD59 mole     |
| FALSE | 6 | 30 | 1.84689 T | MYH14     | MYH14 | 2036 myosin, he   |
| FALSE | 0 | 3  | 1.77318 T | CTSB;DKFZ | CTSB  | 339 cathepsin     |
| FALSE | 0 | 3  | 1.77318 T | TAF15     | TAF15 | 592 TAF15 RN/     |

STRING\_id

9606.ENSP00000377941

9606.ENSP00000382177

9606.ENSP00000324573

9606.ENSP00000295121

9606.ENSP00000303758

9606.ENSP00000393583

9606.ENSP00000442436

9606.ENSP00000005386

9606.ENSP00000252699

9606.ENSP00000263238

9606.ENSP00000295685

9606.ENSP00000314556

9606.ENSP00000316891

9606.ENSP00000352834

9606.ENSP00000262265

9606.ENSP00000356989

9606.ENSP00000367220

NA

9606.ENSP00000323856

9606.ENSP00000301738

9606.ENSP00000325875

9606.ENSP00000427687

NA

9606.ENSP00000380156

9606.ENSP00000261207

NA

9606.ENSP00000429084

9606.ENSP00000298159

9606.ENSP00000283179

9606.ENSP00000381428

9606.ENSP00000215587

9606.ENSP00000401450

9606.ENSP00000202017

9606.ENSP00000369374

9606.ENSP00000449428

9606.ENSP00000421566

9606.ENSP00000342374

9606.ENSP00000318297

9606.ENSP00000253039

9606.ENSP00000259477

9606.ENSP00000413964

9606.ENSP00000261700

9606.ENSP00000262030

9606.ENSP00000272317

9606.ENSP00000309576

9606.ENSP00000328088

9606.ENSP00000353452

9606.ENSP00000216038

NA

9606.ENSP00000384312

9606.ENSP00000223190

9606.ENSP00000346027

9606.ENSP00000252115

9606.ENSP00000367263

9606.ENSP00000337393

9606.ENSP00000301264

9606.ENSP00000378160

9606.ENSP00000319664  
9606.ENSP00000304592  
9606.ENSP00000340210  
9606.ENSP00000262269  
9606.ENSP00000342070  
9606.ENSP00000466950
