# Supplementary figures and images for: [Retracted] Macrophage Rmp Ameliorates Myocardial Infarction by Modulating Macrophage Polarization in Mice
Source: Hindawi journal article supplement (doi:10.1155/2022/6248779), 2022-01-01

Figure S 1

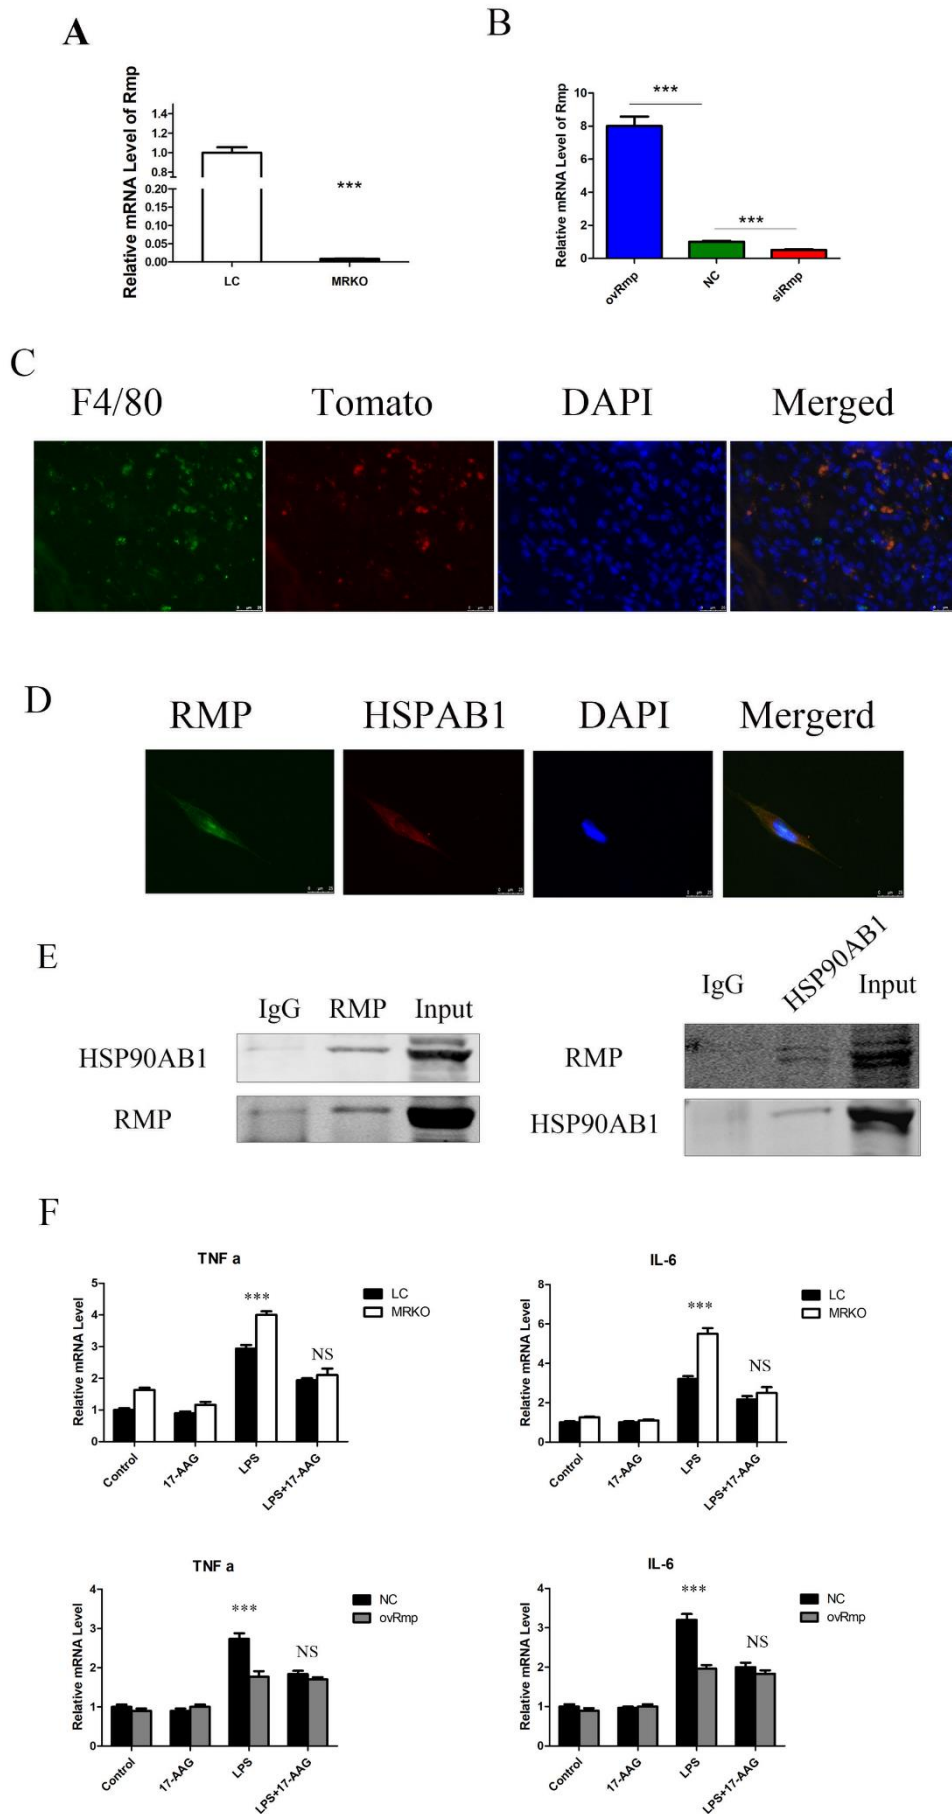

Supplement: f1 [file 6248779.f1.pdf]
